# Supplementary material for: A Comprehensive Proteome and Acetyl-Proteome Atlas Reveals Molecular Mechanisms Adapting to the Physiological Changes From Pre-laying to Peak-Laying Stage in Liver of Hens (Gallus gallus)
Source: PubMed Central journal article supplement (PMC8566343; doi:10.3389/fvets.2021.700669), 2021-10-21

## Supplementary Tables

**Supplementary Table 1.** Statistical information of differentially expressed proteins.

**Supplementary Table 2.** Statistical information of PwSDALs.

**Supplementary Table 3.** Hierarchical clustering information of PwSDALs.

**Supplementary Table 4.** The list of integrated analysis of proteome and acetyl-proteome datas.

**Supplementary Table 5.** Details of each group of proteins based on the integrated analysis of proteome and acetyl-proteome datas.

## Supplementary Figures

**Supplementary Figure 1. Study design and data quality of proteome.** (A) The whole experimental work-flow for the study. (B) PCA analysis. (C) Hierarchical cluster analysis. (D) Elative standard deviation (RSD) of protein quantification.

**Supplementary Figure 2. KEGG pathway analysis indicated that many up-regulated proteins were involved in the pathways of translation.**

**Supplementary Figure 3. Data quality of acetyl-proteome.** (A) PCA analysis. (B) Elative standard deviation (RSD) of protein quantification. (C) The length of the peptide segments.

**Supplementary Figure 4. GO and KEGG enrichment of differentially acetylated proteins.** (A-B) GO enrichment analysis of up-regulated and down-regulated kac proteins in the liver of laying hens, respectively. Only the significantly enriched ( $P \leq 0.05$ ) biological process, cellular component, and molecular function categories are shown. (C-D) KEGG enrichment analysis of up-regulated and down-regulated kac proteins in the liver proteome of laying hens, respectively. Only the significantly enriched ( $P \leq 0.05$ ) pathways are shown.

# Supplementary Figure 1

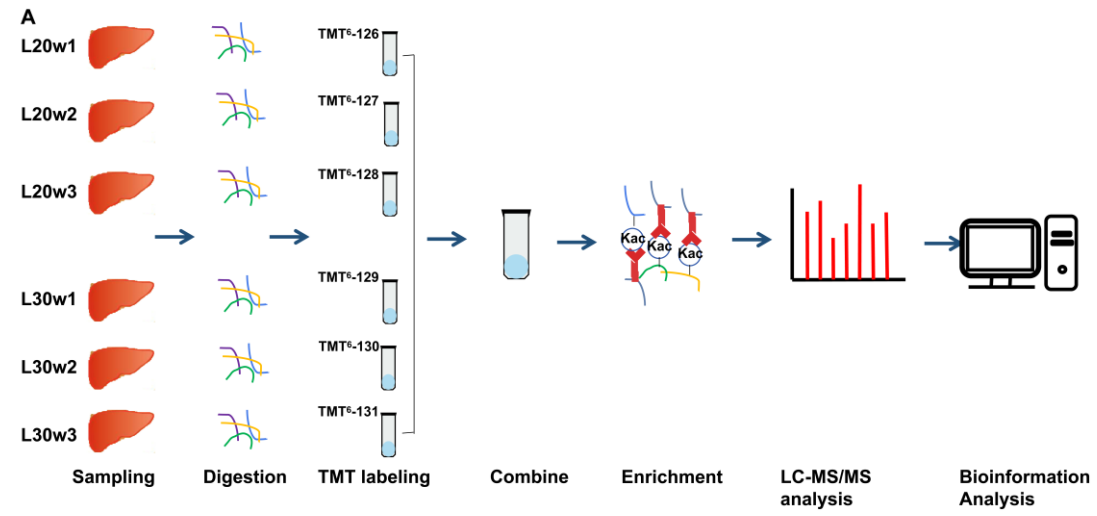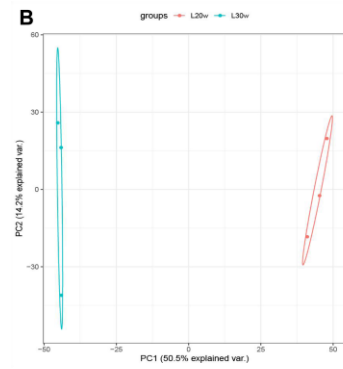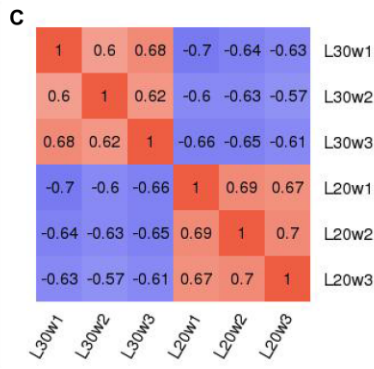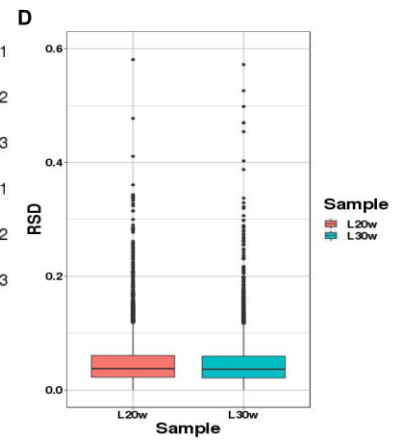

## Supplementary Figure 2

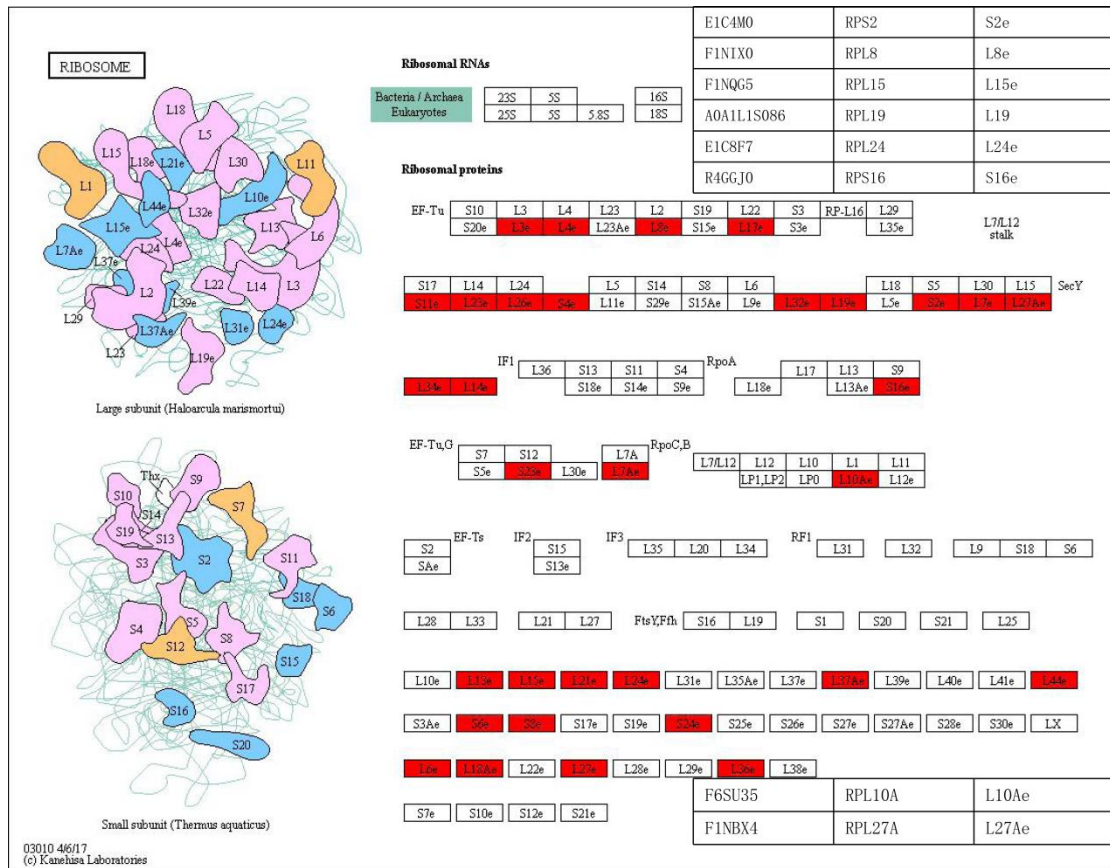

### Supplementary Figure 3

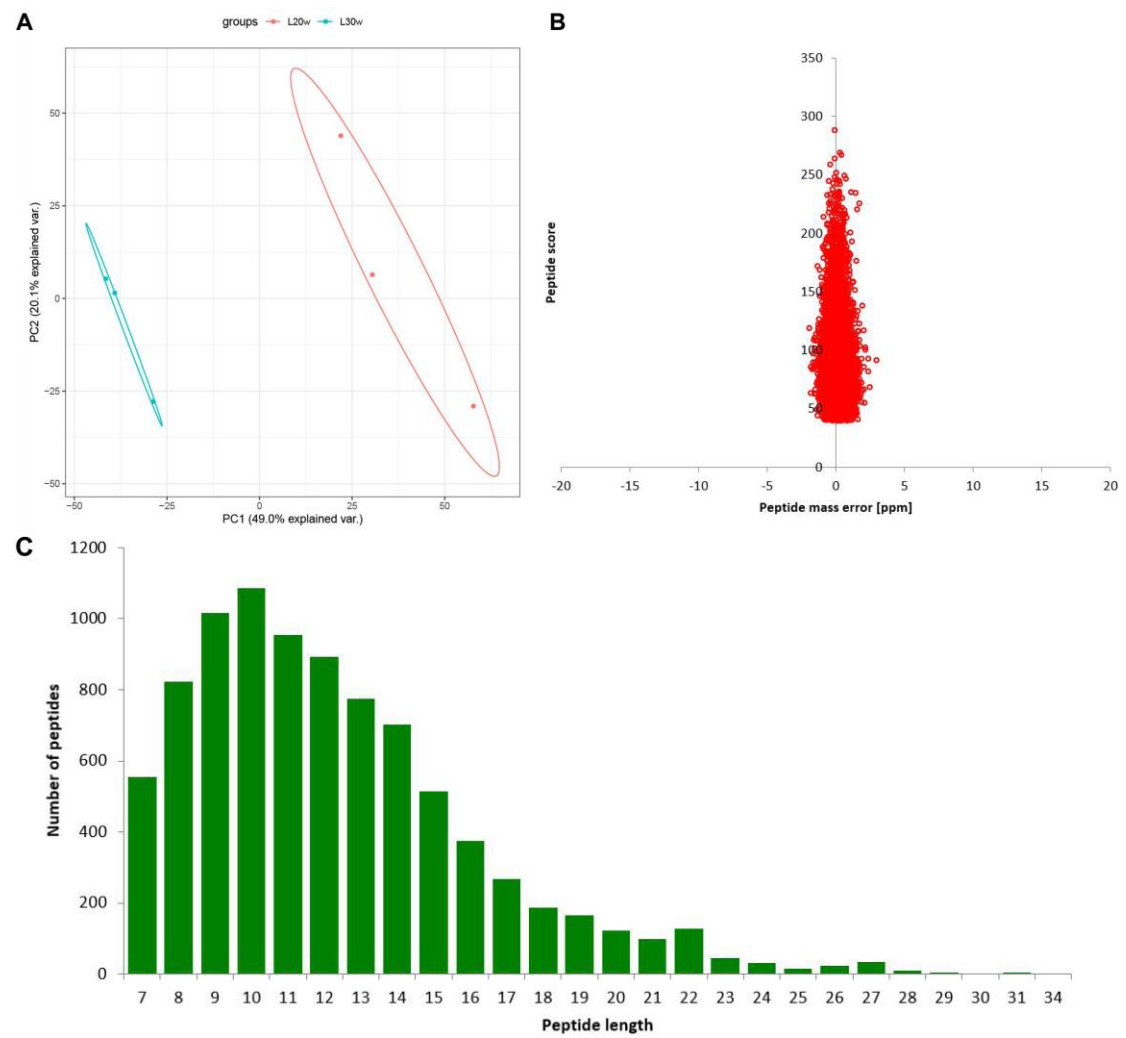

## Supplementary Figure 4

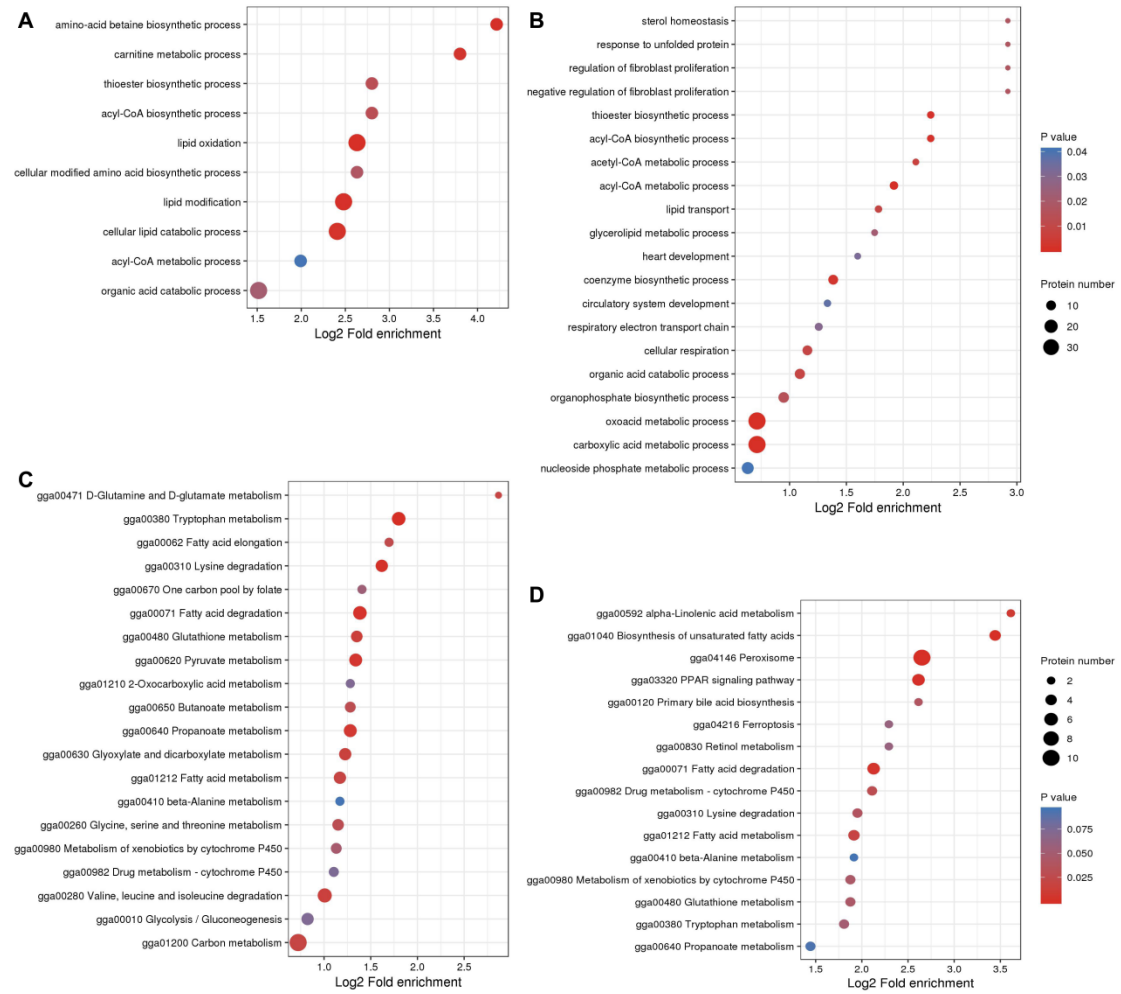

Supplement: Data_Sheet_1.pdf [file Data_Sheet_1.pdf]
