# Supplementary material for: A Comprehensive Proteome and Acetyl-Proteome Atlas Reveals Molecular Mechanisms Adapting to the Physiological Changes From Pre-laying to Peak-Laying Stage in Liver of Hens (Gallus gallus)
Source: Front Vet Sci. 2021 Oct 21;8:700669. doi: 10.3389/fvets.2021.700669 (PMC8566343; doi:10.3389/fvets.2021.700669)
Supplement: Supplementary file 2 [file Table_2.xlsx]

## Sheet: L30wvsL20w
Protein accession	Position	L30w/L20w Ratio	Regulated Type	Amino acid	Protein description	Gene name	Subcellular localization
A0A1D5NT61	390	0.704	Down	K	"Glutamate dehydrogenase 1, mitochondrial"	GLUD1	mitochondria
A0A1D5NT61	392	0.712	Down	K	"Glutamate dehydrogenase 1, mitochondrial"	GLUD1	mitochondria
A0A1D5NT70	127	0.664	Down	K	"glutathione S-transferase, alpha tandem duplicate 1 [Danio rerio]"	GSTAL1	cytoplasm
A0A1D5NT70	196	0.763	Down	K	"glutathione S-transferase, alpha tandem duplicate 1 [Danio rerio]"	GSTAL1	cytoplasm
A0A1D5NUN3	253	1.963	Up	K	"acetyl-coenzyme A synthetase, cytoplasmic [Mus musculus]"	ACSS2	cytoplasm
A0A1D5NUN3	525	0.629	Down	K	"acetyl-coenzyme A synthetase, cytoplasmic [Mus musculus]"	ACSS2	cytoplasm
A0A1D5NW68	464	0.629	Down	K	Serum albumin	ALB	extracellular
A0A1D5NW68	223	0.579	Down	K	Serum albumin	ALB	extracellular
A0A1D5NWL9	74	1.6	Up	K	Peroxisomal multifunctional enzyme type 2 [Stylophora pistillata]	HSD17B4	cytoplasm
A0A1D5NWL9	129	1.627	Up	K	Peroxisomal multifunctional enzyme type 2 [Stylophora pistillata]	HSD17B4	cytoplasm
A0A1D5NWL9	579	1.817	Up	K	Peroxisomal multifunctional enzyme type 2 [Stylophora pistillata]	HSD17B4	cytoplasm
A0A1D5NWL9	555	1.584	Up	K	Peroxisomal multifunctional enzyme type 2 [Stylophora pistillata]	HSD17B4	cytoplasm
A0A1D5NWL9	174	1.489	Up	K	Peroxisomal multifunctional enzyme type 2 [Stylophora pistillata]	HSD17B4	cytoplasm
A0A1D5NX66	296	0.69	Down	K	Serine/threonine-protein kinase 4	STK4	cytoplasm,nucleus
A0A1D5NYK3	51	0.565	Down	K	Glutaryl-CoA dehydrogenase	GCDH	cytoplasm
A0A1D5NYK3	54	0.565	Down	K	Glutaryl-CoA dehydrogenase	GCDH	cytoplasm
A0A1D5P1I5	164	0.481	Down	K	Anoctamin	ANO1	plasma membrane
A0A1D5P650	1707	0.754	Down	K	Clathrin heavy chain	CLTCL1	cytoplasm
A0A1D5P650	1887	0.731	Down	K	Clathrin heavy chain	CLTCL1	cytoplasm
A0A1D5P650	1865	0.734	Down	K	Clathrin heavy chain	CLTCL1	cytoplasm
A0A1D5P765	228	0.743	Down	K	"2-oxoisovalerate dehydrogenase subunit beta, mitochondrial, partial [Stegodyphus mimosarum]"	BCKDHB	mitochondria
A0A1D5P7X9	88	0.749	Down	K	Cytochrome b-c1 complex subunit 7	UQCRB	nucleus
A0A1D5P7X9	19	0.695	Down	K	Cytochrome b-c1 complex subunit 7	UQCRB	nucleus
A0A1D5P8I7	104	0.731	Down	K	Isocitrate dehydrogenase [NADP]	IDH2	mitochondria
A0A1D5P8I7	90	0.714	Down	K	Isocitrate dehydrogenase [NADP]	IDH2	mitochondria
A0A1D5P8I7	129	0.63	Down	K	Isocitrate dehydrogenase [NADP]	IDH2	mitochondria
A0A1D5P8I7	192	0.764	Down	K	Isocitrate dehydrogenase [NADP]	IDH2	mitochondria
A0A1D5P8I7	279	0.71	Down	K	Isocitrate dehydrogenase [NADP]	IDH2	mitochondria
A0A1D5P8I7	132	0.73	Down	K	Isocitrate dehydrogenase [NADP]	IDH2	mitochondria
A0A1D5P8I7	187	0.709	Down	K	Isocitrate dehydrogenase [NADP]	IDH2	mitochondria
A0A1D5P8Q8	323	0.741	Down	K	von Willebrand factor A domain-containing protein 8 [Stylophora pistillata]	VWA8	mitochondria
A0A1D5P8Q8	532	0.765	Down	K	von Willebrand factor A domain-containing protein 8 [Stylophora pistillata]	VWA8	mitochondria
A0A1D5P8W3	197	0.767	Down	K	Glycine N-methyltransferase	GNMT	cytoplasm,nucleus
A0A1D5P930	223	0.415	Down	K	"Isopentenyl-diphosphate Delta-isomerase 1, partial [Stegodyphus mimosarum]"	IDI1	cytoplasm
A0A1D5P975	395	1.403	Up	K	"2-oxoglutarate dehydrogenase, mitochondrial, partial [Stegodyphus mimosarum]"	OGDH	mitochondria
A0A1D5P9K6	84	0.724	Down	K	"Short/branched chain specific acyl-CoA dehydrogenase, mitochondrial [Zootermopsis nevadensis]"	ACADSB	mitochondria
A0A1D5P9K6	244	0.762	Down	K	"Short/branched chain specific acyl-CoA dehydrogenase, mitochondrial [Zootermopsis nevadensis]"	ACADSB	mitochondria
A0A1D5P9K6	357	0.717	Down	K	"Short/branched chain specific acyl-CoA dehydrogenase, mitochondrial [Zootermopsis nevadensis]"	ACADSB	mitochondria
A0A1D5P9N5	174	0.079	Down	K	Vitellogenin-1	VTG1	extracellular
A0A1D5P9N5	487	0.178	Down	K	Vitellogenin-1	VTG1	extracellular
A0A1D5PAU7	138	0.763	Down	K	aminoacylase-1-like [Stylophora pistillata]	ACY1L	cytoplasm
A0A1D5PBG4	74	0.679	Down	K	Galectin	CG-16	cytoplasm
A0A1D5PBG4	99	0.65	Down	K	Galectin	CG-16	cytoplasm
A0A1D5PC90	289	0.488	Down	K	"histidine--tRNA ligase, cytoplasmic-like isoform X1 [Stylophora pistillata]"	HARS	cytoplasm
A0A1D5PCB5	221	1.329	Up	K	interferon-induced guanylate-binding protein 1 [Sus scrofa]	GBP4L	mitochondria
A0A1D5PCW9	597	0.762	Down	K	2-5A-dependent ribonuclease [Equus caballus]	RNASEL	nucleus
A0A1D5PDA1	57	0.756	Down	K	"delta(3,5)-Delta(2,4)-dienoyl-CoA isomerase, mitochondrial-like isoform X3 [Stylophora pistillata]"	ECH1	mitochondria
A0A1D5PDA1	211	0.682	Down	K	"delta(3,5)-Delta(2,4)-dienoyl-CoA isomerase, mitochondrial-like isoform X3 [Stylophora pistillata]"	ECH1	mitochondria
A0A1D5PE45	70	0.721	Down	K	dehydrogenase/reductase SDR family member 4 [Sus scrofa]	DHRS4	plasma membrane
A0A1D5PE45	153	0.747	Down	K	dehydrogenase/reductase SDR family member 4 [Sus scrofa]	DHRS4	plasma membrane
A0A1D5PG15	608	0.7	Down	K	"Sarcosine dehydrogenase, mitochondrial [Stylophora pistillata]"	SARDH	mitochondria
A0A1D5PGH3	121	0.614	Down	K	"[Pyruvate dehydrogenase [acetyl-transferring]]-phosphatase 1, mitochondrial [Zootermopsis nevadensis]"	PDP1	mitochondria
A0A1D5PHJ9	54	0.758	Down	K	"1,4-alpha-glucan-branching enzyme [Zootermopsis nevadensis]"	GBE1	nucleus
A0A1D5PHU5	759	0.561	Down	K	Dolichyl-diphosphooligosaccharide--protein glycosyltransferase subunit STT3B [Zootermopsis nevadensis]	STT3B	plasma membrane
A0A1D5PHU5	654	0.745	Down	K	Dolichyl-diphosphooligosaccharide--protein glycosyltransferase subunit STT3B [Zootermopsis nevadensis]	STT3B	plasma membrane
A0A1D5PL36	219	0.707	Down	K	acetyl-coenzyme A acyltransferase 2 [Bos taurus]	ACAA2	mitochondria
A0A1D5PLK4	239	1.41	Up	K	Collagen alpha-2(VI) chain	COL6A2	extracellular
A0A1D5PMK7	68	0.743	Down	K	Iron-sulfur protein NUBPL [Stylophora pistillata]	NUBPL	mitochondria
A0A1D5PPA8	205	0.756	Down	K	Adenosylhomocysteinase	AHCY	cytoplasm
A0A1D5PPU9	476	1.517	Up	K	Catalase	CAT	cytoplasm
A0A1D5PPU9	243	1.483	Up	K	Catalase	CAT	cytoplasm
A0A1D5PPU9	506	1.514	Up	K	Catalase	CAT	cytoplasm
A0A1D5PPU9	169	0.601	Down	K	Catalase	CAT	cytoplasm
A0A1D5PRN9	155	0.751	Down	K	Ribose-5-phosphate isomerase [Stylophora pistillata]	RPIA	cytoplasm
A0A1D5PRN9	134	0.716	Down	K	Ribose-5-phosphate isomerase [Stylophora pistillata]	RPIA	cytoplasm
A0A1D5PU43	289	0.767	Down	K	"3,2-trans-enoyl-CoA isomerase, mitochondrial [Zootermopsis nevadensis]"	ECI1	mitochondria
A0A1D5PU43	266	0.757	Down	K	"3,2-trans-enoyl-CoA isomerase, mitochondrial [Zootermopsis nevadensis]"	ECI1	mitochondria
A0A1D5PUL8	449	0.755	Down	K	Dihydrolipoamide acetyltransferase component of pyruvate dehydrogenase complex	PDHX	mitochondria
A0A1D5PUZ6	451	0.523	Down	K	"4-aminobutyrate aminotransferase, mitochondrial [Zootermopsis nevadensis]"	ABAT	cytoplasm
A0A1D5PYU9	185	0.753	Down	K	valacyclovir hydrolase-like [Stylophora pistillata]	BPHL	mitochondria
A0A1D5Q004	662	1.362	Up	K	Carnitine O-acetyltransferase [Stylophora pistillata]	CRAT	cytoplasm
A0A1D5Q004	309	0.65	Down	K	Carnitine O-acetyltransferase [Stylophora pistillata]	CRAT	cytoplasm
A0A1D5Q004	458	0.752	Down	K	Carnitine O-acetyltransferase [Stylophora pistillata]	CRAT	cytoplasm
A0A1D5Q004	434	0.672	Down	K	Carnitine O-acetyltransferase [Stylophora pistillata]	CRAT	cytoplasm
A0A1D5Q004	312	0.661	Down	K	Carnitine O-acetyltransferase [Stylophora pistillata]	CRAT	cytoplasm
A0A1D5Q004	526	0.74	Down	K	Carnitine O-acetyltransferase [Stylophora pistillata]	CRAT	cytoplasm
A0A1L1RJW7	110	0.661	Down	K	Glutathione S-transferase kappa	GSTK1	cytoplasm,nucleus
A0A1L1RJW7	223	1.723	Up	K	Glutathione S-transferase kappa	GSTK1	cytoplasm,nucleus
A0A1L1RK25	420	0.672	Down	K	"trifunctional enzyme subunit alpha, mitochondrial-like isoform X1 [Stylophora pistillata]"	HADHA	mitochondria
A0A1L1RL90	13	0.743	Down	K	PREDICTED: LOW QUALITY PROTEIN: cadherin EGF LAG seven-pass G-type receptor 3 [Nipponia nippon]	UQCRC1	extracellular
A0A1L1RN08	365	0.597	Down	K	"Protein ERGIC-53, partial [Stegodyphus mimosarum]"	LMAN1	endoplasmic reticulum
A0A1L1RQA1	85	0.756	Down	K	Eukaryotic translation initiation factor 5A	LOC107050352	cytoplasm
A0A1L1RQM3	436	0.64	Down	K	Aldehyde dehydrogenase family 9 member A1-A [Stylophora pistillata]	ALDH9A1	mitochondria
A0A1L1RQM3	326	0.526	Down	K	Aldehyde dehydrogenase family 9 member A1-A [Stylophora pistillata]	ALDH9A1	mitochondria
A0A1L1RQM3	386	0.745	Down	K	Aldehyde dehydrogenase family 9 member A1-A [Stylophora pistillata]	ALDH9A1	mitochondria
A0A1L1RQM3	336	0.656	Down	K	Aldehyde dehydrogenase family 9 member A1-A [Stylophora pistillata]	ALDH9A1	mitochondria
A0A1L1RQM3	319	0.607	Down	K	Aldehyde dehydrogenase family 9 member A1-A [Stylophora pistillata]	ALDH9A1	mitochondria
A0A1L1RQM3	388	0.608	Down	K	Aldehyde dehydrogenase family 9 member A1-A [Stylophora pistillata]	ALDH9A1	mitochondria
A0A1L1RRG5	159	0.659	Down	K	saccharopine dehydrogenase-like oxidoreductase [Exaiptasia pallida]	SCCPDH	peroxisome
A0A1L1RRG5	63	0.727	Down	K	saccharopine dehydrogenase-like oxidoreductase [Exaiptasia pallida]	SCCPDH	peroxisome
A0A1L1RS37	204	0.765	Down	K	"Hydroxyacyl-coenzyme A dehydrogenase, mitochondrial [Stylophora pistillata]"	HADH	cytoplasm
A0A1L1RS37	48	0.717	Down	K	"Hydroxyacyl-coenzyme A dehydrogenase, mitochondrial [Stylophora pistillata]"	HADH	cytoplasm
A0A1L1RS76	344	0.67	Down	K	"Electron transfer flavoprotein-ubiquinone oxidoreductase, mitochondrial [Stylophora pistillata]"	ETFDH	cytoplasm
A0A1L1RUK2	88	1.329	Up	K	Glutamate--cysteine ligase regulatory subunit [Stylophora pistillata]	DNTTIP2	cytoplasm,nucleus
A0A1L1RVZ9	59	3.173	Up	K	UDP-glucuronosyltransferase 1-6-like [Stylophora pistillata]	---	extracellular
A0A1L1RVZ9	77	2.473	Up	K	UDP-glucuronosyltransferase 1-6-like [Stylophora pistillata]	---	extracellular
A0A1L1RY78	291	0.766	Down	K	"tRNA-nucleotidyltransferase 1, mitochondrial [Zootermopsis nevadensis]"	TRNT1	cytoplasm
A0A1L1RY78	78	0.74	Down	K	"tRNA-nucleotidyltransferase 1, mitochondrial [Zootermopsis nevadensis]"	TRNT1	cytoplasm
A0A1L1RZG2	86	0.736	Down	K	Aflatoxin B1 aldehyde reductase member 4 [Exaiptasia pallida]	AKR7A2	cytoplasm
A0A1L1RZG2	76	0.76	Down	K	Aflatoxin B1 aldehyde reductase member 4 [Exaiptasia pallida]	AKR7A2	cytoplasm
A0A1L1RZG2	47	0.743	Down	K	Aflatoxin B1 aldehyde reductase member 4 [Exaiptasia pallida]	AKR7A2	cytoplasm
A0A1L1RZS5	60	0.722	Down	K	Ribonuclease UK114 [Stylophora pistillata]	RIDA	mitochondria
A0A1L1RZS5	56	0.697	Down	K	Ribonuclease UK114 [Stylophora pistillata]	RIDA	mitochondria
A6NAB8	28	0.623	Down	K	Delta-6 fatty acid desaturase	FADS2	cytoplasm
E1BQU2	384	0.766	Down	K	Phosphoacetylglucosamine mutase	PGM3	cytoplasm
E1BRU9	495	2.482	Up	K	"Peroxisomal carnitine O-octanoyltransferase, partial [Stegodyphus mimosarum]"	CROT	cytoplasm
E1BS15	582	0.752	Down	K	"acyl-CoA synthetase family member 2, mitochondrial-like isoform X2 [Stylophora pistillata]"	ACSF2	nucleus
E1BS15	201	1.522	Up	K	"acyl-CoA synthetase family member 2, mitochondrial-like isoform X2 [Stylophora pistillata]"	ACSF2	nucleus
E1BSH9	95	0.75	Down	K	betaine--homocysteine S-methyltransferase 1 [Homo sapiens]	BHMT	cytoplasm
E1BSH9	145	0.683	Down	K	betaine--homocysteine S-methyltransferase 1 [Homo sapiens]	BHMT	cytoplasm
E1BSL7	303	0.769	Down	K	endoplasmic reticulum resident protein 44 precursor [Sus scrofa]	ERP44	mitochondria
E1BT93	370	0.697	Down	K	"aldehyde dehydrogenase, mitochondrial precursor [Bos taurus]"	ALDH2	mitochondria
E1BT93	380	0.583	Down	K	"aldehyde dehydrogenase, mitochondrial precursor [Bos taurus]"	ALDH2	mitochondria
E1BT93	83	0.708	Down	K	"aldehyde dehydrogenase, mitochondrial precursor [Bos taurus]"	ALDH2	mitochondria
E1BTT4	291	0.737	Down	K	Hydroxyacyl-CoA dehydrogenase trifunctional multienzyme complex subunit beta	---	nucleus
E1BTT4	253	0.66	Down	K	Hydroxyacyl-CoA dehydrogenase trifunctional multienzyme complex subunit beta	---	nucleus
E1BTT4	277	0.632	Down	K	Hydroxyacyl-CoA dehydrogenase trifunctional multienzyme complex subunit beta	---	nucleus
E1BTT4	408	0.69	Down	K	Hydroxyacyl-CoA dehydrogenase trifunctional multienzyme complex subunit beta	---	nucleus
E1BTT7	40	0.757	Down	K	Neutral alpha-glucosidase AB [Zootermopsis nevadensis]	GANC	cytoplasm
E1BU39	320	0.506	Down	K	Acyl-coenzyme A amino acid N-acyltransferase 2 [Stylophora pistillata]	ACOT1L	mitochondria
E1BVD1	238	0.727	Down	K	"1,5-anhydro-D-fructose reductase [Sus scrofa]"	AKR1B10L3	cytoplasm
E1BVD1	231	0.659	Down	K	"1,5-anhydro-D-fructose reductase [Sus scrofa]"	AKR1B10L3	cytoplasm
E1BVD1	90	0.592	Down	K	"1,5-anhydro-D-fructose reductase [Sus scrofa]"	AKR1B10L3	cytoplasm
E1BVD1	195	0.716	Down	K	"1,5-anhydro-D-fructose reductase [Sus scrofa]"	AKR1B10L3	cytoplasm
E1BVT3	342	0.636	Down	K	Malate dehydrogenase	MDH2	mitochondria
E1BVT3	341	0.604	Down	K	Malate dehydrogenase	MDH2	mitochondria
E1BW06	57	1.662	Up	K	"Peroxisomal 3,2-trans-enoyl-CoA isomerase [Zootermopsis nevadensis]"	ECI2	mitochondria
E1BW06	68	1.832	Up	K	"Peroxisomal 3,2-trans-enoyl-CoA isomerase [Zootermopsis nevadensis]"	ECI2	mitochondria
E1BW06	60	1.516	Up	K	"Peroxisomal 3,2-trans-enoyl-CoA isomerase [Zootermopsis nevadensis]"	ECI2	mitochondria
E1BWC6	103	0.603	Down	K	"Calcium-binding atopy-related autoantigen 1, partial [Zootermopsis nevadensis]"	MICU1	mitochondria
E1BWX4	709	0.459	Down	K	Aminoadipate-semialdehyde synthase	AASS	mitochondria
E1BXC8	205	0.766	Down	K	Protein transport protein Sec31A [Zootermopsis nevadensis]	SEC31B	nucleus
E1BXS8	31	1.343	Up	K	---	CMBL	cytoplasm
E1BXT1	287	0.757	Down	K	Cat eye syndrome critical region protein 5 [Zootermopsis nevadensis]	CECR5	mitochondria
E1BZT9	344	0.705	Down	K	Acetyl-coenzyme A synthetase	ACSS1L	extracellular
E1BZT9	341	0.758	Down	K	Acetyl-coenzyme A synthetase	ACSS1L	extracellular
E1C003	627	1.369	Up	K	Choline dehydrogenase	CHDH	nucleus
E1C003	560	1.459	Up	K	Choline dehydrogenase	CHDH	nucleus
E1C0L2	280	0.71	Down	K	"3-hydroxyanthranilate 3,4-dioxygenase"	HAAO	cytoplasm
E1C1T9	70	1.951	Up	K	"Trifunctional enzyme subunit alpha, mitochondrial [Stylophora pistillata]"	EHHADH	mitochondria
E1C218	933	0.677	Down	K	dedicator of cytokinesis protein 6 [Bos taurus]	---	nucleus
E1C388	6	1.404	Up	K	ATP-dependent RNA helicase DHX29	DHX29	nucleus
E1C4U7	23	0.749	Down	K	NADH:ubiquinone oxidoreductase subunit B3	NDUFB3	cytoplasm
E1C4W4	376	0.747	Down	K	Alpha-aminoadipic semialdehyde dehydrogenase [Stylophora pistillata]	ALDH7A1	mitochondria
E1C658	78	0.765	Down	K	"ATP synthase subunit d, mitochondrial"	ATP5H	mitochondria
E1C6X1	27	0.611	Down	K	"Inorganic pyrophosphatase, partial [Stegodyphus mimosarum]"	PPA2	cytoplasm
E1C6X1	94	0.554	Down	K	"Inorganic pyrophosphatase, partial [Stegodyphus mimosarum]"	PPA2	cytoplasm
E1C6X1	245	0.721	Down	K	"Inorganic pyrophosphatase, partial [Stegodyphus mimosarum]"	PPA2	cytoplasm
E1C6X1	91	0.554	Down	K	"Inorganic pyrophosphatase, partial [Stegodyphus mimosarum]"	PPA2	cytoplasm
E1C6X1	92	0.554	Down	K	"Inorganic pyrophosphatase, partial [Stegodyphus mimosarum]"	PPA2	cytoplasm
E1C7S2	24	0.756	Down	K	hydroxysteroid dehydrogenase-like protein 2 [Stylophora pistillata]	HSDL2	cytoplasm
E1C934	434	0.639	Down	K	Kynurenine aminotransferase 3	KYAT3	mitochondria
E1C934	425	0.731	Down	K	Kynurenine aminotransferase 3	KYAT3	mitochondria
E1C9F5	795	0.758	Down	K	"Presequence protease, mitochondrial [Zootermopsis nevadensis]"	PITRM1	mitochondria
E1C9H5	278	0.689	Down	K	Aminoadipate aminotransferase	AADAT	mitochondria
E1C9H5	214	0.592	Down	K	Aminoadipate aminotransferase	AADAT	mitochondria
F1N9Z7	499	2.058	Up	K	Succinyl-CoA:3-ketoacid-coenzyme A transferase	OXCT1	mitochondria
F1NAC6	83	0.692	Down	K	PREDICTED: LOW QUALITY PROTEIN: cadherin EGF LAG seven-pass G-type receptor 3 [Nipponia nippon]	UQCRC1	mitochondria
F1NAC6	97	0.565	Down	K	PREDICTED: LOW QUALITY PROTEIN: cadherin EGF LAG seven-pass G-type receptor 3 [Nipponia nippon]	UQCRC1	mitochondria
F1NAC6	445	0.745	Down	K	PREDICTED: LOW QUALITY PROTEIN: cadherin EGF LAG seven-pass G-type receptor 3 [Nipponia nippon]	UQCRC1	mitochondria
F1NB02	36	0.739	Down	K	40S ribosomal protein S8	RPS8	nucleus
F1NB64	206	1.373	Up	K	"3-ketoacyl-CoA thiolase, mitochondrial [Zootermopsis nevadensis]"	ACAA1	mitochondria
F1NBE3	333	0.724	Down	K	"2-amino-3-ketobutyrate coenzyme A ligase, mitochondrial [Zootermopsis nevadensis]"	GCAT	mitochondria
F1NBV3	129	0.616	Down	K	"L-2-hydroxyglutarate dehydrogenase, mitochondrial [Stylophora pistillata]"	L2HGDH	mitochondria
F1NC38	280	0.746	Down	K	"acyl-CoA dehydrogenase protein, partial [Fasciola hepatica]"	ACADL	mitochondria
F1NCM5	76	0.591	Down	K	Prostaglandin reductase 1 [Zootermopsis nevadensis]	PTGR1	cytoplasm
F1NDC2	25	0.66	Down	K	40S ribosomal protein S23 [Stylophora pistillata]	RPS23	cytoplasm
F1NEF6	596	1.327	Up	K	"acyl-CoA dehydrogenase family member 9, mitochondrial-like [Stylophora pistillata]"	ACAD9	mitochondria
F1NEF6	154	1.477	Up	K	"acyl-CoA dehydrogenase family member 9, mitochondrial-like [Stylophora pistillata]"	ACAD9	mitochondria
F1NGM2	99	0.747	Down	K	"chaperone, ABC1 activity of bc1 complex like, partial [Bos taurus]"	COQ8A	cytoplasm
F1NGU3	1274	0.743	Down	K	"Leucine-rich PPR motif-containing protein, mitochondrial [Zootermopsis nevadensis]"	LRPPRC	mitochondria
F1NH84	180	0.715	Down	K	"GTP:AMP phosphotransferase AK3, mitochondrial"	AK3	cytoplasm
F1NH84	164	0.76	Down	K	"GTP:AMP phosphotransferase AK3, mitochondrial"	AK3	cytoplasm
F1NHL4	105	0.725	Down	K	Cytosol aminopeptidase [Stylophora pistillata]	LAP3	mitochondria
F1NI85	43	0.599	Down	K	catechol O-methyltransferase domain-containing protein 1-like isoform X4 [Stylophora pistillata]	COMTD1	endoplasmic reticulum
F1NJK4	160	2.316	Up	K	serine hydrolase-like protein 2 [Gallus gallus]	SERHL2	cytoplasm
F1NJV0	173	0.738	Down	K	"NAD kinase 2, mitochondrial"	NADK2	mitochondria
F1NLN3	180	0.768	Down	K	Nudix hydrolase 6	---	nucleus
F1NLN3	142	0.754	Down	K	Nudix hydrolase 6	---	nucleus
F1NLN3	121	0.685	Down	K	Nudix hydrolase 6	---	nucleus
F1NLN3	135	0.537	Down	K	Nudix hydrolase 6	---	nucleus
F1NMC3	361	0.663	Down	K	"C-1-tetrahydrofolate synthase, cytoplasmic [Zootermopsis nevadensis]"	MTHFD1	cytoplasm
F1NMJ2	179	0.736	Down	K	"Adenylate kinase 4, mitochondrial"	AK4	mitochondria
F1NPD1	289	0.19	Down	K	Sulfotransferase	SULT	extracellular
F1NPD1	305	0.314	Down	K	Sulfotransferase	SULT	extracellular
F1NPD1	135	0.324	Down	K	Sulfotransferase	SULT	extracellular
F1NPK5	639	0.356	Down	K	Microsomal triglyceride transfer protein large subunit-like protein	MTTPL	extracellular
F1NPK5	143	0.356	Down	K	Microsomal triglyceride transfer protein large subunit-like protein	MTTPL	extracellular
F1NPL9	34	0.532	Down	K	Cytochrome c oxidase copper chaperone [Zootermopsis nevadensis]	COX17	extracellular
F1NPM6	233	0.768	Down	K	"NADH dehydrogenase [ubiquinone] 1 alpha subcomplex subunit 10, mitochondrial"	NDUFA10	mitochondria
F1NPM6	187	0.63	Down	K	"NADH dehydrogenase [ubiquinone] 1 alpha subcomplex subunit 10, mitochondrial"	NDUFA10	mitochondria
F1NQC6	157	0.731	Down	K	"putative 2-oxoglutarate dehydrogenase E1 component DHKTD1-like protein, mitochondrial [Zootermopsis nevadensis]"	DHTKD1	nucleus
F1NS20	94	0.582	Down	K	"D-glutamate cyclase, mitochondrial-like isoform X1 [Stylophora pistillata]"	C5H14orf159	mitochondria
F1NSC1	116	0.735	Down	K	"ATP synthase subunit b, mitochondrial [Zootermopsis nevadensis]"	ATP5F1	mitochondria
F1NSC1	195	0.768	Down	K	"ATP synthase subunit b, mitochondrial [Zootermopsis nevadensis]"	ATP5F1	mitochondria
F1NSS4	192	2.077	Up	K	Non-specific lipid-transfer protein	SCP2	mitochondria
F1NSS4	277	1.656	Up	K	Non-specific lipid-transfer protein	SCP2	mitochondria
F1NT14	55	0.709	Down	K	Microsomal glutathione S-transferase 1	MGST1	extracellular
F1NT19	72	0.728	Down	K	Superoxide dismutase	SOD2	mitochondria
F1NTK1	333	0.523	Down	K	Phosphoserine aminotransferase	PSAT1	cytoplasm
F1NTK1	295	0.525	Down	K	Phosphoserine aminotransferase	PSAT1	cytoplasm
F1NTZ0	233	1.475	Up	K	alcohol dehydrogenase class-3 isoform 1 [Mus musculus]	LOC107053269	cytoplasm
F1NTZ0	340	1.511	Up	K	alcohol dehydrogenase class-3 isoform 1 [Mus musculus]	LOC107053269	cytoplasm
F1NTZ0	341	1.467	Up	K	alcohol dehydrogenase class-3 isoform 1 [Mus musculus]	LOC107053269	cytoplasm
F1NUL5	283	0.532	Down	K	"Ran-binding protein 9, partial [Stegodyphus mimosarum]"	RANBP10	nucleus
F1NUQ3	59	0.193	Down	K	Heart fatty acid binding protein	FABP3	cytoplasm
F1NUQ3	53	0.352	Down	K	Heart fatty acid binding protein	FABP3	cytoplasm
F1NUQ3	82	0.623	Down	K	Heart fatty acid binding protein	FABP3	cytoplasm
F1NV02	4348	0.567	Down	K	Apolipoprotein B	APOB	extracellular
F1NV02	4315	0.451	Down	K	Apolipoprotein B	APOB	extracellular
F1NV02	1509	0.599	Down	K	Apolipoprotein B	APOB	extracellular
F1NV02	1155	0.677	Down	K	Apolipoprotein B	APOB	extracellular
F1NV02	1947	0.594	Down	K	Apolipoprotein B	APOB	extracellular
F1NV02	3461	0.661	Down	K	Apolipoprotein B	APOB	extracellular
F1NVA1	218	0.58	Down	K	"acyl-coenzyme A synthetase ACSM3, mitochondrial-like [Stylophora pistillata]"	ACSM3	mitochondria
F1NW23	367	0.722	Down	K	Clathrin heavy chain	CLTC	cytoplasm
F1NY09	123	0.745	Down	K	Chromosome 11 open reading frame 54	C1H11ORF54	cytoplasm
F1NY09	195	0.651	Down	K	Chromosome 11 open reading frame 54	C1H11ORF54	cytoplasm
F1NY29	98	0.745	Down	K	"Electron transfer flavoprotein-ubiquinone oxidoreductase, mitochondrial [Stylophora pistillata]"	ETFDH	mitochondria
F1NY29	225	0.734	Down	K	"Electron transfer flavoprotein-ubiquinone oxidoreductase, mitochondrial [Stylophora pistillata]"	ETFDH	mitochondria
F1NY29	148	0.731	Down	K	"Electron transfer flavoprotein-ubiquinone oxidoreductase, mitochondrial [Stylophora pistillata]"	ETFDH	mitochondria
F1NY37	268	1.652	Up	K	Acyl-coenzyme A oxidase	ACOX1	cytoplasm
F1NY37	438	1.488	Up	K	Acyl-coenzyme A oxidase	ACOX1	cytoplasm
F1NY37	644	1.725	Up	K	Acyl-coenzyme A oxidase	ACOX1	cytoplasm
F1NY37	653	1.454	Up	K	Acyl-coenzyme A oxidase	ACOX1	cytoplasm
F1NY37	513	1.653	Up	K	Acyl-coenzyme A oxidase	ACOX1	cytoplasm
F1NYJ6	169	0.636	Down	K	Gem-associated protein 5 [Stylophora pistillata]	GEMIN5	nucleus
F1P0K1	199	0.683	Down	K	myosin-4-like [Stylophora pistillata]	RRBP1	endoplasmic reticulum
F1P0M2	212	0.767	Down	K	"Propionyl-CoA carboxylase alpha chain, mitochondrial, partial [Stegodyphus mimosarum]"	PCCA	mitochondria
F1P0M2	247	0.739	Down	K	"Propionyl-CoA carboxylase alpha chain, mitochondrial, partial [Stegodyphus mimosarum]"	PCCA	mitochondria
F1P130	772	0.432	Down	K	10-formyltetrahydrofolate dehydrogenase	ALDH1L2	mitochondria
F1P130	780	0.584	Down	K	10-formyltetrahydrofolate dehydrogenase	ALDH1L2	mitochondria
F1P180	152	0.656	Down	K	Aspartate aminotransferase	GOT2	mitochondria
F1P180	227	0.626	Down	K	Aspartate aminotransferase	GOT2	mitochondria
F1P180	193	0.729	Down	K	Aspartate aminotransferase	GOT2	mitochondria
F1P180	397	0.719	Down	K	Aspartate aminotransferase	GOT2	mitochondria
F1P180	84	0.648	Down	K	Aspartate aminotransferase	GOT2	mitochondria
F1P180	197	0.703	Down	K	Aspartate aminotransferase	GOT2	mitochondria
F1P180	83	0.695	Down	K	Aspartate aminotransferase	GOT2	mitochondria
F1P180	228	0.601	Down	K	Aspartate aminotransferase	GOT2	mitochondria
F1P180	75	0.682	Down	K	Aspartate aminotransferase	GOT2	mitochondria
F1P180	51	0.638	Down	K	Aspartate aminotransferase	GOT2	mitochondria
F1P180	115	0.737	Down	K	Aspartate aminotransferase	GOT2	mitochondria
F1P180	52	0.675	Down	K	Aspartate aminotransferase	GOT2	mitochondria
F1P180	302	0.672	Down	K	Aspartate aminotransferase	GOT2	mitochondria
F1P269	1070	0.746	Down	K	ATP-citrate synthase	ACLY	cytoplasm
F1P269	331	0.71	Down	K	ATP-citrate synthase	ACLY	cytoplasm
F1P269	544	0.673	Down	K	ATP-citrate synthase	ACLY	cytoplasm
F1P2D2	97	0.68	Down	K	"3'(2'), 5'-bisphosphate nucleotidase 1"	BPNT1	mitochondria
F1P2D2	48	0.69	Down	K	"3'(2'), 5'-bisphosphate nucleotidase 1"	BPNT1	mitochondria
F1P2P3	135	0.738	Down	K	"putative cysteinyl-tRNA synthetase, mitochondrial [Zootermopsis nevadensis]"	CARS2	cytoskeleton
F1P463	301	1.59	Up	K	"Cytosolic non-specific dipeptidase, partial [Stegodyphus mimosarum]"	CNDP2	cytoplasm
F1P4I0	64	0.733	Down	K	Quinone oxidoreductase [Stylophora pistillata]	CRYZ	mitochondria
F1P4U5	138	0.761	Down	K	"thioredoxin reductase 2, mitochondrial-like [Stylophora pistillata]"	TXNRD2	mitochondria
F1P4U5	157	0.746	Down	K	"thioredoxin reductase 2, mitochondrial-like [Stylophora pistillata]"	TXNRD2	mitochondria
F2Z4L4	154	0.732	Down	K	"Protein SET, partial [Stegodyphus mimosarum]"	SET	cytoplasm
F6QGI8	142	0.754	Down	K	"RecName: Full=Fructose-1,6-bisphosphatase isozyme 2; Short=FBPase 2; AltName: Full=D-fructose-1,6-bisphosphate 1-phosphohydrolase 2; AltName: Full=Muscle FBPase"	FBP1	cytoplasm
H9KZH2	123	0.766	Down	K	Nitrilase 1	NIT1	extracellular
H9L0I5	157	0.606	Down	K	"39S ribosomal protein L10, mitochondrial [Zootermopsis nevadensis]"	MRPL10	mitochondria
H9L0I5	115	0.584	Down	K	"39S ribosomal protein L10, mitochondrial [Zootermopsis nevadensis]"	MRPL10	mitochondria
O42283	8	0.47	Down	K	Heat shock protein 10	HSPE1	mitochondria
P00940	155	0.717	Down	K	Triosephosphate isomerase	TPI1	cytoplasm
P02659	102	0.11	Down	K	Apovitellenin-1	---	extracellular
P02659	94	0.586	Down	K	Apovitellenin-1	---	extracellular
P02659	96	0.494	Down	K	Apovitellenin-1	---	extracellular
P02789	471	1.764	Up	K	Ovotransferrin	---	extracellular
P08267	162	0.753	Down	K	Ferritin heavy chain	FTH	cytoplasm
P09102	314	1.366	Up	K	Protein disulfide-isomerase	P4HB	extracellular
P11029	2112	1.379	Up	K	Acetyl-CoA carboxylase	ACAC	cytoplasm
P11029	1737	0.671	Down	K	Acetyl-CoA carboxylase	ACAC	cytoplasm
P27463	427	1.988	Up	K	Retinal dehydrogenase 1	ALDH1A1	cytoplasm
P31335	67	0.765	Down	K	Bifunctional purine biosynthesis protein PURH	ATIC	cytoplasm
P31335	165	0.653	Down	K	Bifunctional purine biosynthesis protein PURH	ATIC	cytoplasm
P31335	407	0.695	Down	K	Bifunctional purine biosynthesis protein PURH	ATIC	cytoplasm
P31335	200	0.725	Down	K	Bifunctional purine biosynthesis protein PURH	ATIC	cytoplasm
P53488	331	1.528	Up	K	Actin-related protein 2	ACTR2	cytoplasm
Q02020	24	1.314	Up	K	Fibrinogen beta chain (Fragment)	FGB	cytoplasm
Q08393	141	0.766	Down	K	Glutathione S-transferase	---	cytoplasm
Q08393	43	0.7	Down	K	Glutathione S-transferase	---	cytoplasm
Q5F424	135	0.757	Down	K	Chaperonin containing TCP1 subunit 2	CCT2	cytoplasm
Q5F426	90	0.745	Down	K	Pyruvate dehydrogenase E1 component subunit alpha	PDHA1	mitochondria
Q5F426	394	0.684	Down	K	Pyruvate dehydrogenase E1 component subunit alpha	PDHA1	mitochondria
Q5F4B3	258	1.38	Up	K	"Trimethyllysine dioxygenase, mitochondrial"	TMLHE	mitochondria
Q5ZHR4	165	0.669	Down	K	Glycyl-tRNA synthetase	GARS	cytoplasm
Q5ZHR4	423	0.672	Down	K	Glycyl-tRNA synthetase	GARS	cytoplasm
Q5ZHR4	150	0.747	Down	K	Glycyl-tRNA synthetase	GARS	cytoplasm
Q5ZHT1	68	1.398	Up	K	Acyl-CoA dehydrogenase family member 11	ACAD11	nucleus
Q5ZHT1	771	1.866	Up	K	Acyl-CoA dehydrogenase family member 11	ACAD11	nucleus
Q5ZHT1	79	1.922	Up	K	Acyl-CoA dehydrogenase family member 11	ACAD11	nucleus
Q5ZHT1	404	1.758	Up	K	Acyl-CoA dehydrogenase family member 11	ACAD11	nucleus
Q5ZI51	149	0.672	Down	K	Poly(ADP-ribose) glycohydrolase ARH3	ADPRHL2	mitochondria
Q5ZIA5	107	0.543	Down	K	Coatomer subunit beta	COPB1	cytoskeleton
Q5ZIX9	332	0.743	Down	K	Threonine synthase like 1	THNSL1	cytoplasm
Q5ZJ21	417	1.378	Up	K	Catenin delta 1	RCJMB04_21j12	cytoplasm,nucleus
Q5ZJV5	69	0.744	Down	K	Cytochrome c oxidase subunit 4I1	COX4I1	mitochondria
Q5ZJV5	62	0.75	Down	K	Cytochrome c oxidase subunit 4I1	COX4I1	mitochondria
Q5ZJV5	65	0.606	Down	K	Cytochrome c oxidase subunit 4I1	COX4I1	mitochondria
Q5ZKA2	760	0.695	Down	K	"Isoleucine--tRNA ligase, mitochondrial"	IARS2	mitochondria
Q5ZKA2	482	0.675	Down	K	"Isoleucine--tRNA ligase, mitochondrial"	IARS2	mitochondria
Q5ZKA2	766	0.687	Down	K	"Isoleucine--tRNA ligase, mitochondrial"	IARS2	mitochondria
Q5ZKA2	214	0.762	Down	K	"Isoleucine--tRNA ligase, mitochondrial"	IARS2	mitochondria
Q5ZKA2	634	0.74	Down	K	"Isoleucine--tRNA ligase, mitochondrial"	IARS2	mitochondria
Q5ZKQ2	25	0.588	Down	K	Quinoid dihydropteridine reductase	QDPR	mitochondria
Q5ZL72	130	1.37	Up	K	"60 kDa heat shock protein, mitochondrial"	HSPD1	mitochondria
Q5ZL72	473	0.768	Down	K	"60 kDa heat shock protein, mitochondrial"	HSPD1	mitochondria
Q5ZL72	369	0.742	Down	K	"60 kDa heat shock protein, mitochondrial"	HSPD1	mitochondria
Q5ZL72	250	1.356	Up	K	"60 kDa heat shock protein, mitochondrial"	HSPD1	mitochondria
Q5ZM32	276	0.637	Down	K	Dihydrolipoyl dehydrogenase	DLD	mitochondria
Q5ZM32	142	0.763	Down	K	Dihydrolipoyl dehydrogenase	DLD	mitochondria
Q5ZM32	165	0.54	Down	K	Dihydrolipoyl dehydrogenase	DLD	mitochondria
Q5ZM32	282	0.768	Down	K	Dihydrolipoyl dehydrogenase	DLD	mitochondria
Q5ZM32	121	0.744	Down	K	Dihydrolipoyl dehydrogenase	DLD	mitochondria
Q5ZM32	158	0.769	Down	K	Dihydrolipoyl dehydrogenase	DLD	mitochondria
Q5ZM32	272	0.512	Down	K	Dihydrolipoyl dehydrogenase	DLD	mitochondria
Q5ZM32	429	0.639	Down	K	Dihydrolipoyl dehydrogenase	DLD	mitochondria
Q5ZM32	409	0.753	Down	K	Dihydrolipoyl dehydrogenase	DLD	mitochondria
Q5ZM33	546	1.57	Up	K	Heterochromatin protein 1-binding protein 3	HP1BP3	nucleus
Q5ZMB2	64	0.705	Down	K	Heme-binding protein 1	HEBP1	cytoplasm
Q789A6	1532	0.761	Down	K	Nonmuscle myosin heavy chain	MYH10	cytoplasm
Q8AXQ0	113	0.687	Down	K	Translocating chain-associated membrane protein	TRAM	plasma membrane
Q90687	131	0.738	Down	K	Tyrosine-protein phosphatase non-receptor type 11	PTPN11	cytoplasm
Q90875	572	0.699	Down	K	Cytoplasmic aconitate hydratase	ACO1	cytoplasm
Q90875	400	0.705	Down	K	Cytoplasmic aconitate hydratase	ACO1	cytoplasm
Q90875	327	0.698	Down	K	Cytoplasmic aconitate hydratase	ACO1	cytoplasm
Q90875	857	0.691	Down	K	Cytoplasmic aconitate hydratase	ACO1	cytoplasm
Q90875	141	0.694	Down	K	Cytoplasmic aconitate hydratase	ACO1	cytoplasm
Q90WR6	293	1.766	Up	K	Sulfotransferase	SULT1C	cytoplasm
Q98TH5	58	0.701	Down	K	Ribosomal protein S11	cRPS11	cytoplasm
Q9PRL8	54	1.444	Up	K	Acyl-CoA-binding protein	DBI	cytoplasm
Q9W6J2	141	1.463	Up	K	Glutathione S-transferase class-alpha	GSTA4L	cytoplasm
Q9W6J2	195	0.65	Down	K	Glutathione S-transferase class-alpha	GSTA4L	cytoplasm
Q9YH58	287	0.608	Down	K	Formimidoyltransferase-cyclodeaminase	FTCD	cytoplasm
R4GJC4	236	2.433	Up	K	"UMP-CMP kinase 2, mitochondrial [Zootermopsis nevadensis]"	CMPK2	mitochondria
R4GJX5	101	0.688	Down	K	"Peptide methionine sulfoxide reductase, partial [Stegodyphus mimosarum]"	MSRA	mitochondria
R4GL80	263	0.625	Down	K	Coenzyme A synthase	---	mitochondria
R9PXN7	112	0.748	Down	K	Hematopoietic prostaglandin D synthase	HPGDS	cytoplasm
